# Supplementary figures and images for: Effect of face-to-face and side-to-side interchain interactions on the electron transport in emeraldine salt polyaniline
Source: Royal Society of Chemistry journal article supplement (doi:10.1039/d0cp06194h), 2021-01-01

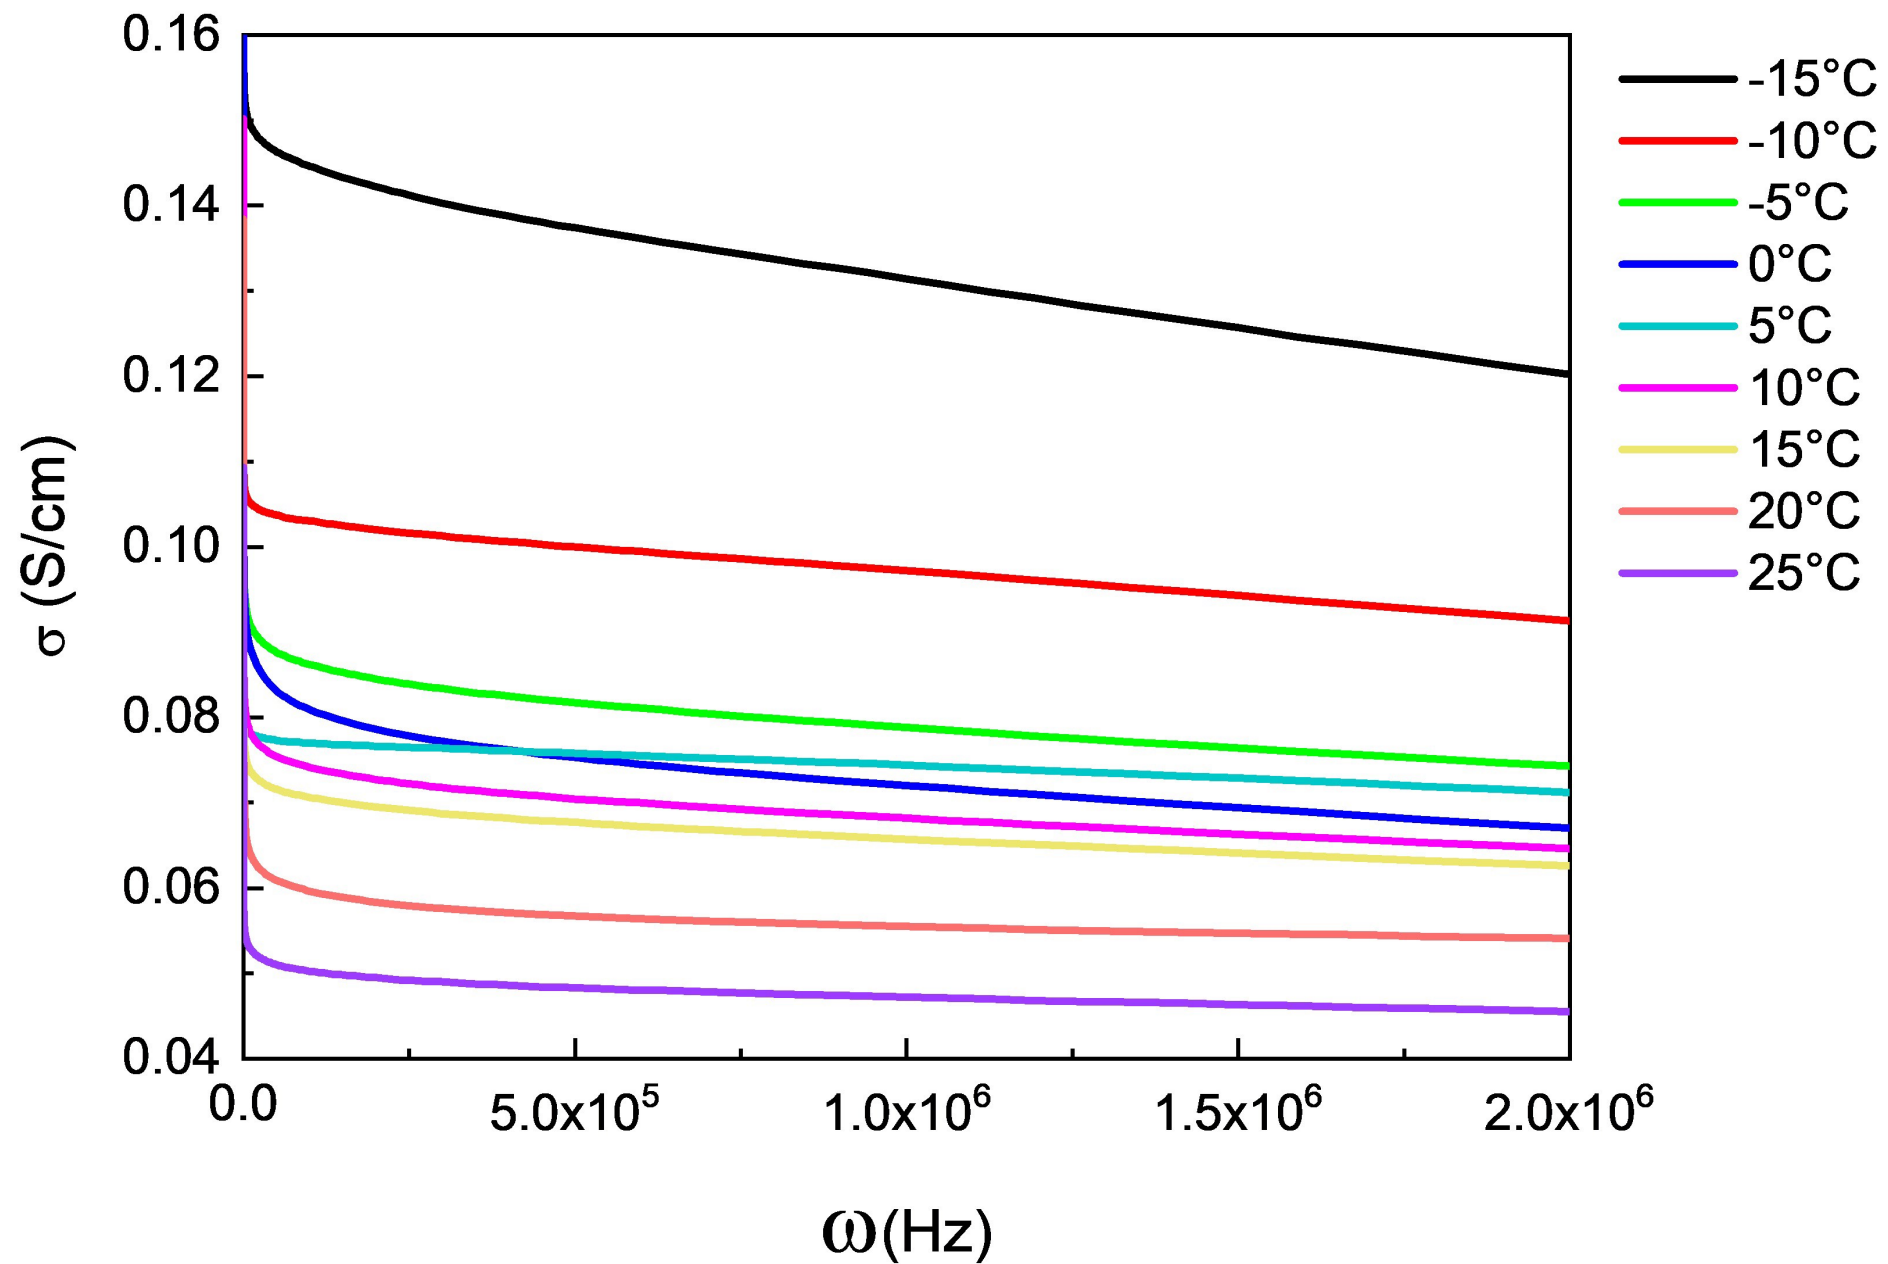

Supplement: d0cp06194h3.pdf [file d0cp06194h3.pdf]

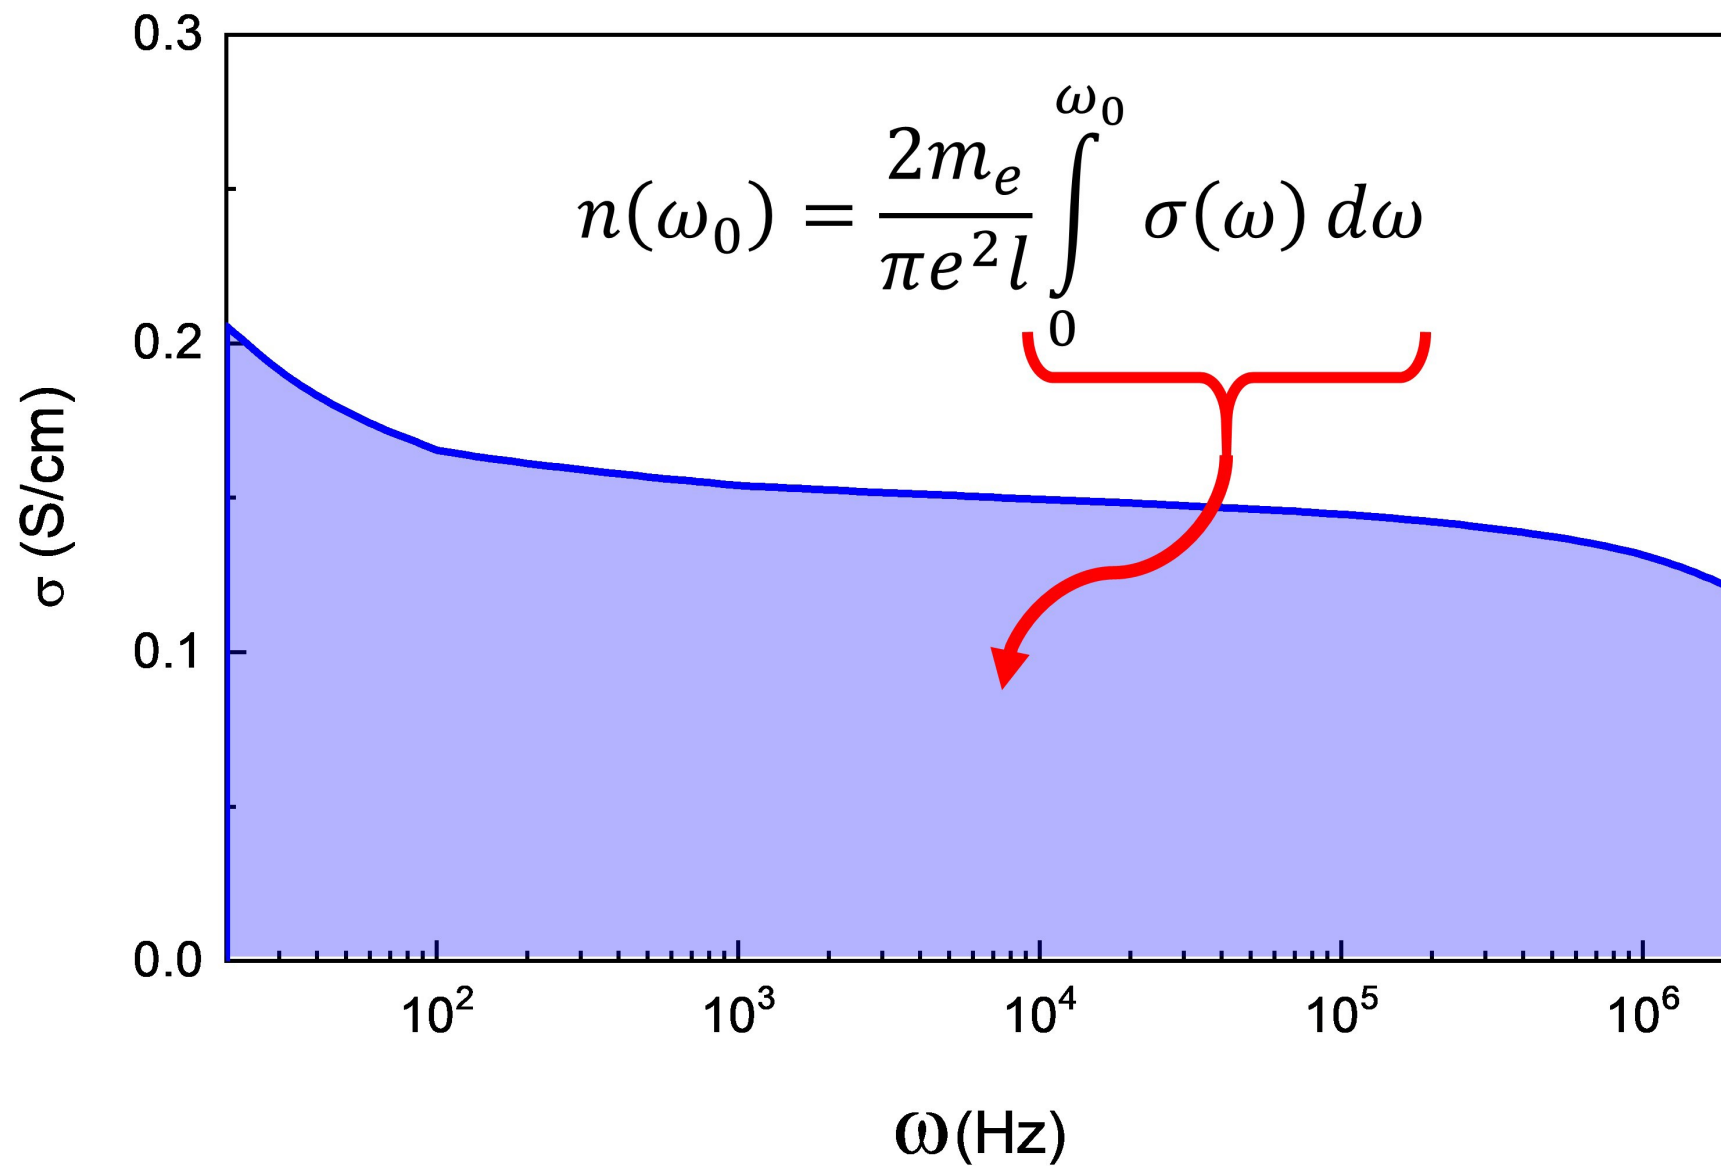

Supplement: d0cp06194h4.pdf [file d0cp06194h4.pdf]

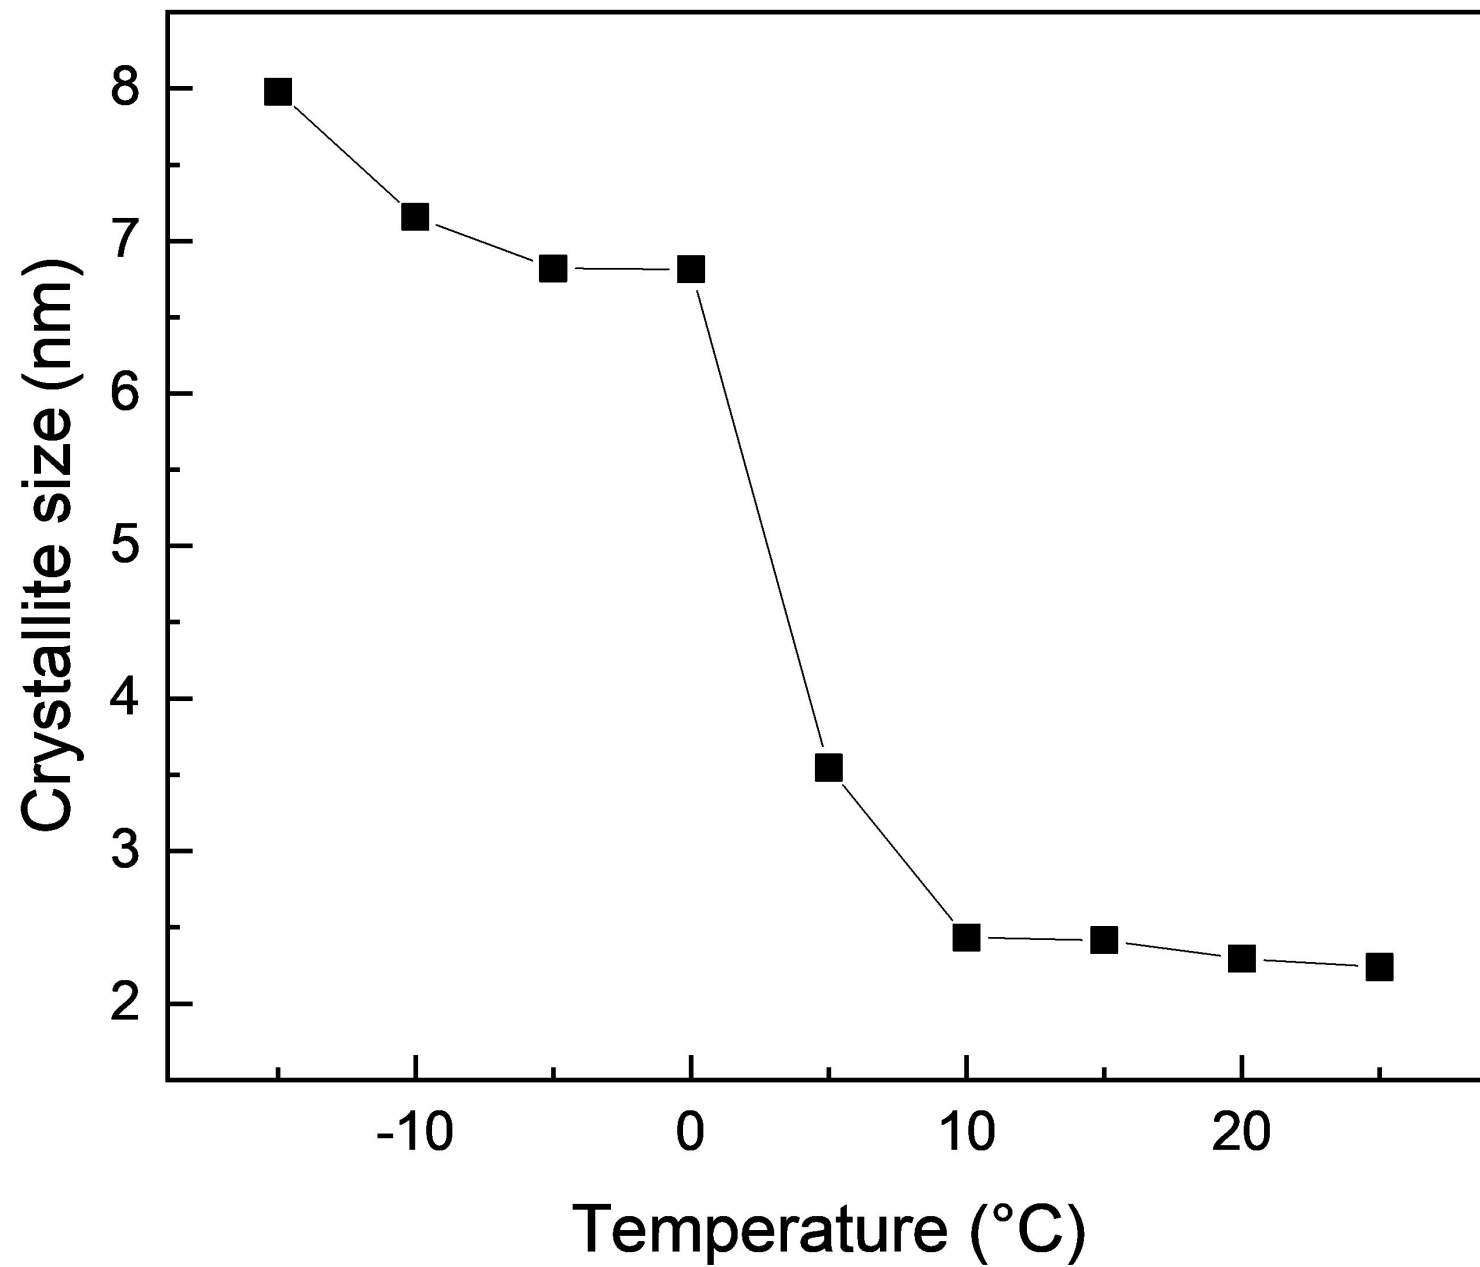

Supplement: d0cp06194h5.pdf [file d0cp06194h5.pdf]
